## Correction: Recurrent mutations in a *SERPINC1* hotspot associate with venous thrombosis without apparent antithrombin deficiency

Wei Zeng<sup>1,2,\*</sup>, Bei Hu<sup>1,\*</sup>, Liang Tang<sup>1,\*</sup>, Yan-Yan You<sup>3</sup>, Mara Toderici<sup>4</sup>, Maria Eugenia de la Morena-Barrio<sup>4</sup>, Javier Corral<sup>4</sup> and Yu Hu<sup>1</sup>

<sup>1</sup> Institute of Hematology, Union Hospital, Tongji Medical College, Huazhong University of Science and Technology, Wuhan, China

<sup>2</sup> Department of Radiation and Medical Oncology, Zhongnan Hospital of Wuhan University, Wuhan, Hubei, China

<sup>3</sup> Department of Anesthesiology, Tongji Hospital, Tongji Medical College, Huazhong University of Science and Technology, Wuhan, China

<sup>4</sup> Centro Regional de Hemodonación, Universidad de Murcia, IMIB, CIBERER, Murcia, Spain

\* These authors have contributed equally to this work

**Published:** February 16, 2018

**Copyright:** Zeng et al. This is an open-access article distributed under the terms of the Creative Commons Attribution License 3.0 (CC BY 3.0), which permits unrestricted use, distribution, and reproduction in any medium, provided the original author and source are credited.

**This article has been corrected:** the 1<sup>st</sup> affiliation has been revised.

Original article: Oncotarget. 2017; 8:84417-84425. <https://doi.org/10.18632/oncotarget.21365>
